# Supplementary material for: Serum Progranulin Level Might Differentiate Non-IPF ILD from IPF
Source: MDPI journal article supplement (doi:10.3390/ijms24119178), 2023-05-24
Supplement: s1 [file s1]

## Supplementary Material

**Table S1.** Stepwise multiple linear regression analysis of the potential predictors of serum PGRN level

| Linear regression analysis* |                             |        |                                    |             |                  |
|-----------------------------|-----------------------------|--------|------------------------------------|-------------|------------------|
| Model                       |                             | Beta   | 95.0% Confidence Interval for Beta |             | p value          |
|                             |                             |        | Lower Bound                        | Upper Bound |                  |
| Step 1                      | Age                         | 0.550  | 0.323                              | 0.552       | <b>&lt;0.001</b> |
|                             | Sex                         | 0.427  | 8.375                              | 16.936      | <b>&lt;0.001</b> |
| Step 2                      | Age                         | 0.601  | 0.341                              | 0.615       | <b>&lt;0.001</b> |
|                             | Sex                         | 0.341  | 5.266                              | 14.978      | <b>&lt;0.001</b> |
|                             | Antifibrotic treatment      | 0.009  | -5.772                             | 7.315       | 0.815            |
|                             | Immunosuppressive treatment | 0.083  | 2.741                              | 20.882      | <b>0.011</b>     |
| Step 3                      | Age                         | 0.416  | 0.168                              | 0.494       | <b>&lt;0.001</b> |
|                             | Sex                         | 0.345  | 5.550                              | 14.895      | <b>&lt;0.001</b> |
|                             | Antifibrotic treatment      | -0.021 | -8.373                             | 4.679       | 0.576            |
|                             | Immunosuppressive treatment | 0.045  | -3.093                             | 15.778      | 0.185            |
|                             | ILD present                 | 0.228  | 4.279                              | 20.607      | <b>0.003</b>     |
| Step 4                      | Age                         | 0.467  | 0.212                              | 0.531       | <b>&lt;0.001</b> |
|                             | Sex                         | 0.311  | 4.658                              | 13.771      | <b>&lt;0.001</b> |
|                             | Antifibrotic treatment      | 0.081  | -1.568                             | 15.997      | 0.106            |
|                             | Immunosuppressive treatment | 0.032  | -4.653                             | 13.706      | 0.330            |
|                             | ILD present                 | 0.262  | 6.321                              | 22.261      | <b>0.001</b>     |
|                             | IPF                         | -0.162 | -21.928                            | -4.234      | <b>0.004</b>     |
| Step 5                      | Age                         | 0.353  | 0.125                              | 0.436       | <b>&lt;0.001</b> |
|                             | Sex                         | 0.195  | 1.207                              | 10.350      | <b>0.014</b>     |
|                             | Antifibrotic treatment      | 0.078  | -1.259                             | 15.107      | 0.096            |
|                             | Immunosuppressive treatment | 0.015  | -6.572                             | 10.703      | 0.636            |
|                             | ILD present                 | 0.553  | 19.328                             | 40.894      | <b>&lt;0.001</b> |
|                             | IPF                         | -0.053 | -13.602                            | 5.034       | 0.364            |
|                             | UIP                         | -0.220 | -19.966                            | -6.756      | <b>&lt;0.001</b> |

\*Dependent variable: PGRN level
